# Supplementary material
Source: Springer Nature journal article supplement (https://www.springermedizin.de/resource/supplementary/12882_2013_737_MOESM4_ESM.docx/9454598)
Supplement: MOESM4 [file 9454598]

**Figure 4: Adjusted odds ratios of incident catheter usage by distance to centre and region.**


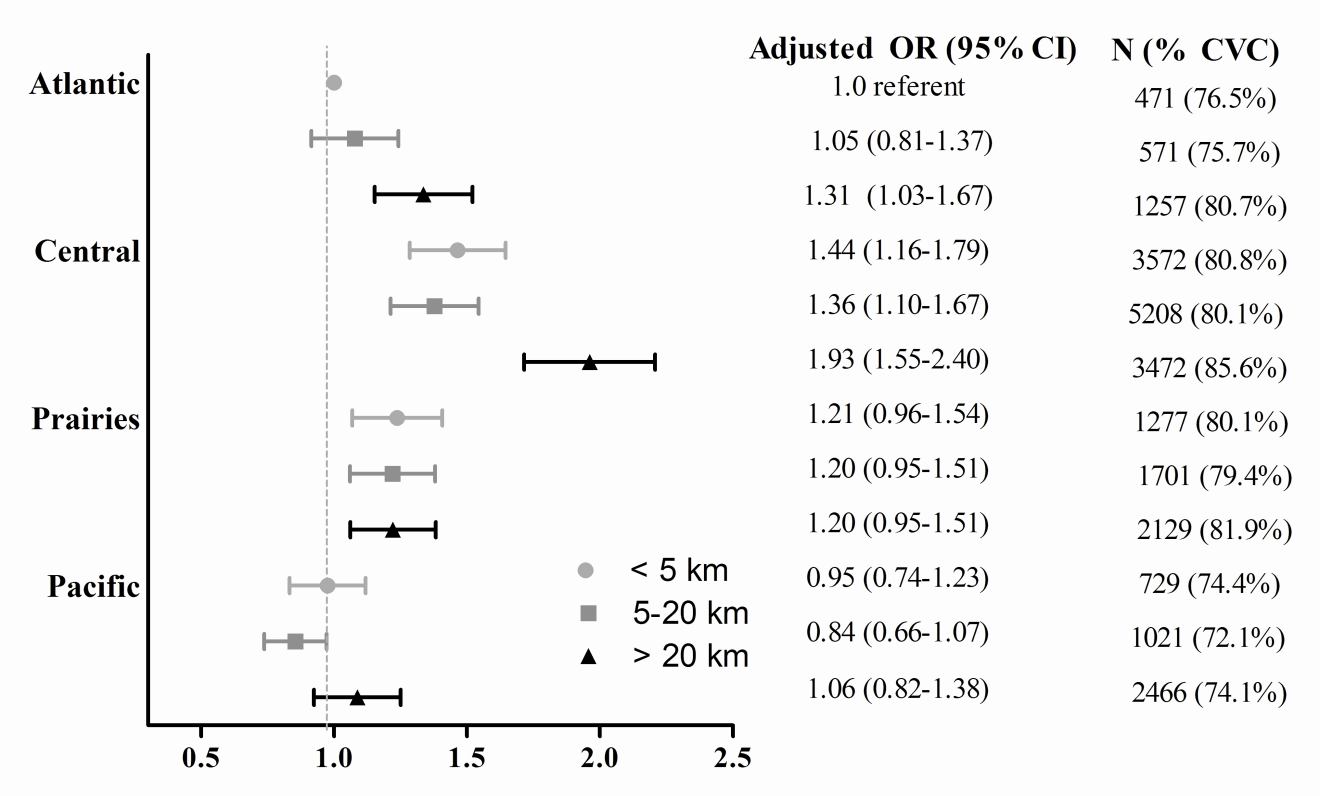


Region X distance interaction p < 0.0001 for incident vascular access

Adjusted for race, sex, age, BMI, alb, Hb, co-morbidities, cause of ESRD, pre-dialysis care.

N number, OR odds ratio, CVC central venous catheter, km kilometre
